# Supplementary material for: Effects of Proton Pump Inhibitors on the Gastrointestinal Microbiota in Gastroesophageal Reflux Disease
Source: PubMed Central journal article supplement (PMC6520915; doi:10.1016/j.gpb.2018.12.004), 2019-04-25

$R = 0.418$ ,  $P = 0.001$

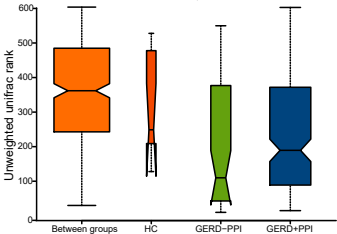

Supplement: mmc1.pdf [file mmc1.pdf]
